# Supplementary material for: Three-Dimensional Printed Biomimetic Robotic Fish for Dynamic Monitoring of Water Quality in Aquaculture
Source: MDPI journal article supplement (doi:10.3390/mi14081578), 2023-08-10
Supplement: s1 [file s1]

# Supplementary Materials

## 3D printed biomimetic robotic fish for dynamic monitoring of water quality in aquaculture

Xiaojun Chen \*, Dejin Li, Deyun Mo, Zaifu Cui, Xin Li, Haishan Lian and  
Manfeng Gong

School of Mechanical and Electronic Engineering, Lingnan Normal University, Zhanjiang,  
China

\* Correspondence: [chxj@lingnan.edu.cn](mailto:chxj@lingnan.edu.cn)

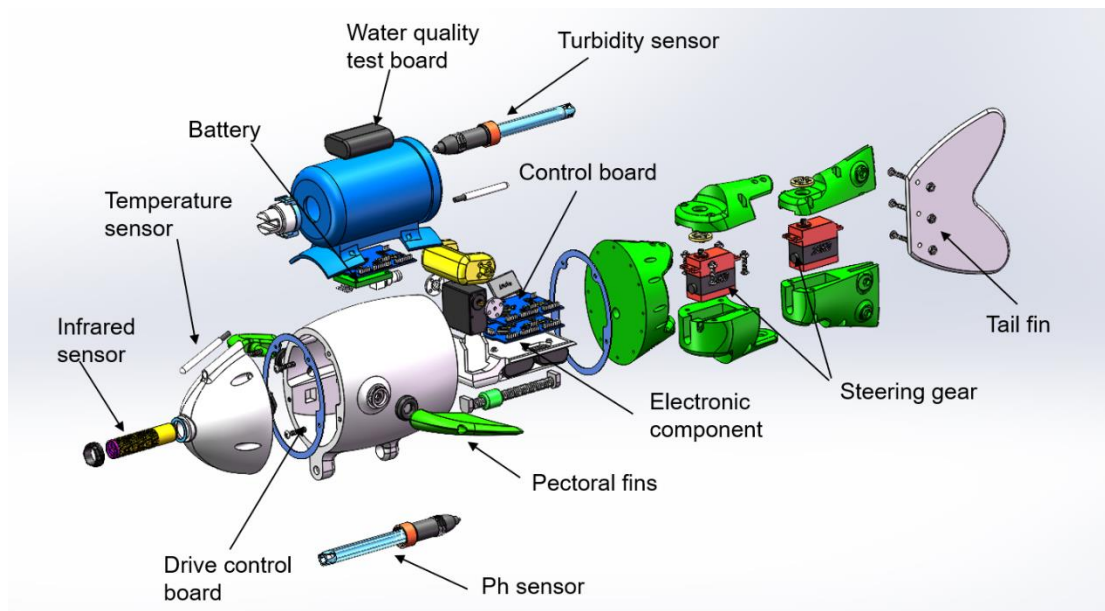

**Figure S1.** Bionic machine fish structure explosion diagram

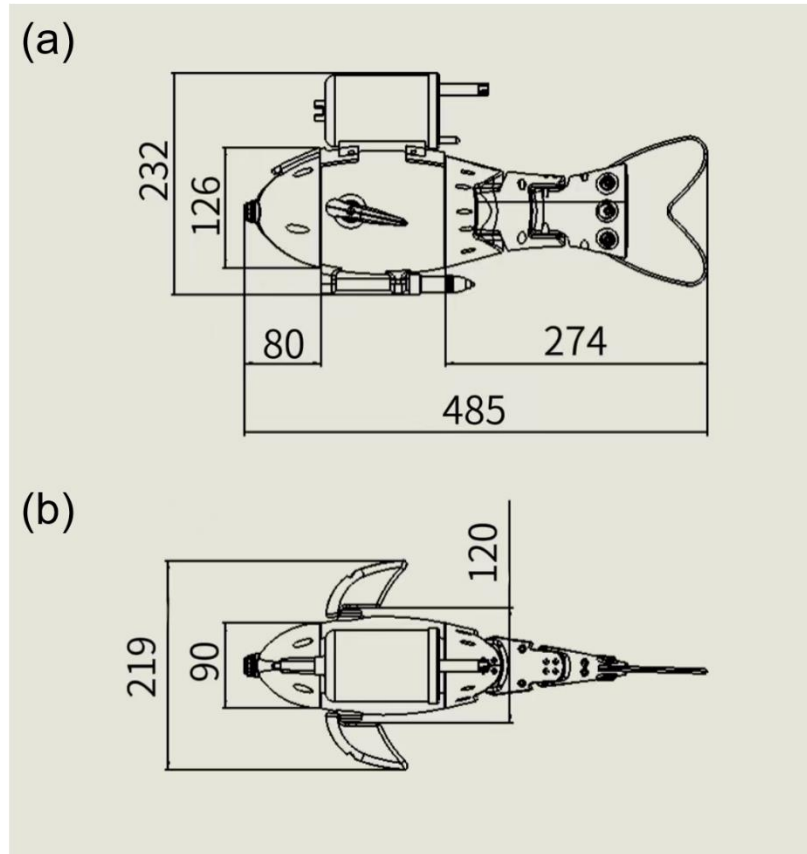

**Figure S2.** Main dimensions of robotic fish, (a) front view, (b) top view. The whole size is mm.

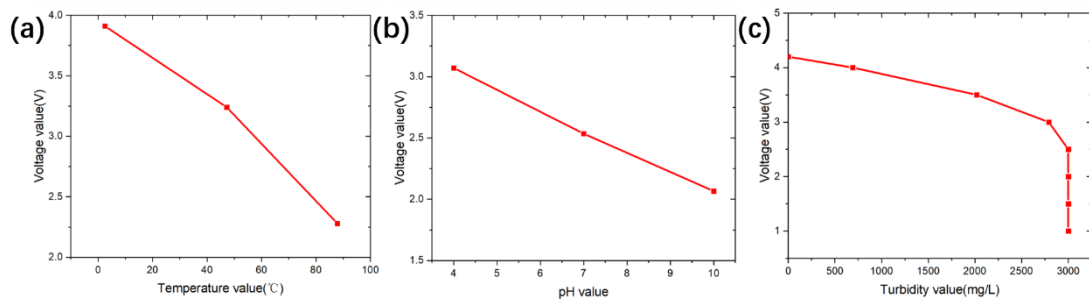

**Figure S3.** Water Quality Parameter Calibration Curve
